# Supplementary material for: Mesoporous carbonated hydroxyapatite/chitosan porous materials for removal of Pb(ii) ions under flow conditions
Source: Royal Society of Chemistry journal article supplement (doi:10.1039/c6ra20448a), 2016-01-01
Supplement: c6ra20448a1.pdf [file c6ra20448a1.pdf]

## Electronic Supplementary Information

### Mesoporous carbonated hydroxyapatite/chitosan porous materials for removal of Pb(II) ions under flow conditions

Xi Wen†, Chuntao shao†, Wei Chen, Yong Lei, Qin-Fei Ke, Ya-Ping Guo\*

The Education Ministry Key Lab of Resource Chemistry and Shanghai Key Laboratory of Rare Earth Functional Materials, Shanghai Normal University, Shanghai 200234, PR China.

Corresponding author: Y. P. Guo

E-mail address: [ypguo@shnu.edu.cn](mailto:ypguo@shnu.edu.cn)

Tel: +86-21-64321951; Fax: +86-21-64321951

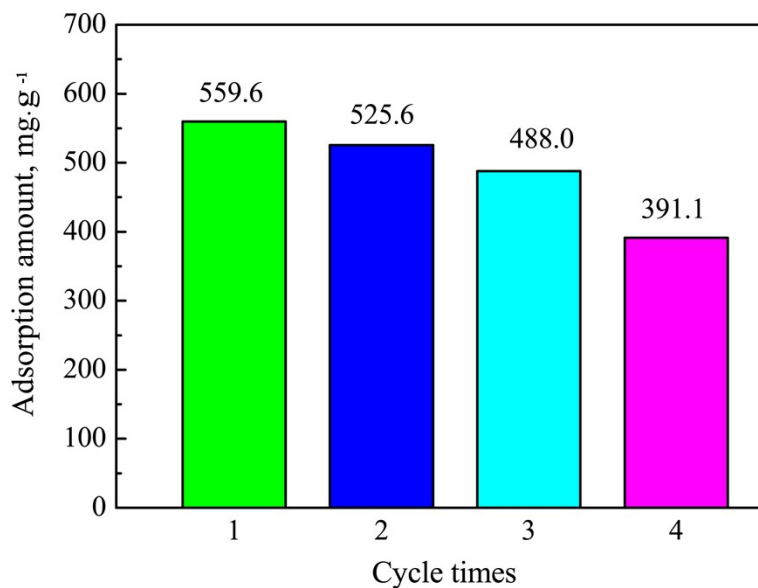

**Fig. S1.** Equilibrium adsorption amounts of Pb(II) ions on MHCMs at different cycle times. The original concentration of Pb(II) solutions is 400 mg/L, and the pH value is kept at 5.5.

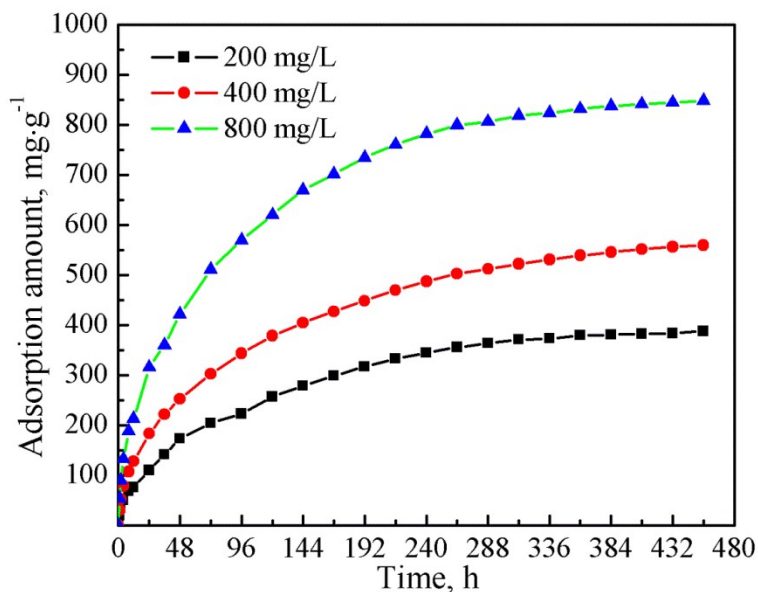

**Fig. S2.** Cumulative adsorption amounts of Pb<sup>2+</sup> on MHCMs under lead solutions with different original concentrations of 200, 400 and 800 mg/L.

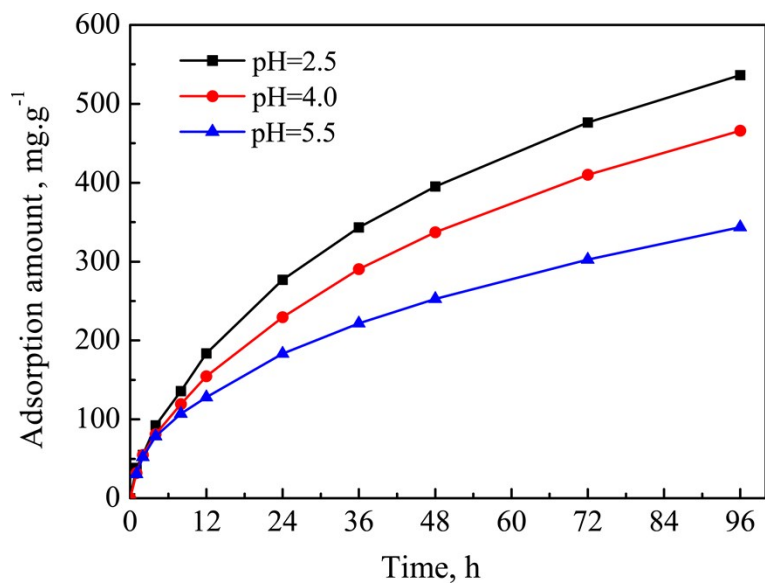

**Fig. S3.** Cumulative adsorption amounts of  $Pb^{2+}$  ions on MHCMs under the lead solutions with different pH values. The original concentration of lead solutions are 400 mg/L.
